# Supplementary material for: Potential workload in applying clinical practice guidelines for patients with chronic conditions and multimorbidity: a systematic analysis
Source: PubMed Central journal article supplement — BMJ Open. 2016 Mar 22;6(3):e010119. doi: 10.1136/bmjopen-2015-010119 (PMC4809109; doi:10.1136/bmjopen-2015-010119), 2016-03-22
Supplement: bmjopen-2015-010119supp.pdf [file bmjopen-2015-010119supp.pdf]

# Potential workload in applying clinical-practice guidelines for patients with chronic conditions and multimorbidity

## Supplementary File

Céline Buffel du Vaure<sup>1,2,3</sup>, Philippe Ravaud<sup>2,3,4,5,6</sup>, Gabriel Baron<sup>2,3,4,5</sup>, Caroline Barnes<sup>2,3</sup>, Serge Gilberg<sup>1,2</sup>, Isabelle Boutron<sup>2,3,4,5</sup>

**1** Département de Médecine Générale, Université Paris Descartes, Faculté de Médecine, Sorbonne Paris Cité, 24 rue du Faubourg Saint Jacques, 75014 Paris, France, **2** Université Paris Descartes, Faculté de Médecine, Sorbonne Paris Cité, France, **3** METHODS Team, Epidemiology and Statistics Sorbonne Paris Cité, Research Center UMR 1153, INSERM, 1 place du Parvis de Notre-Dame, 75004 Paris, France, **4** Assistance Publique des Hôpitaux de Paris (AP-HP), Hôpital Hôtel Dieu, Centre d'Epidémiologie Clinique, Paris, France, **5** Centre de Médecine Fondée sur les Preuves (EHESP, HAS, INSERM, AP-HP), Paris, France, **6** Department of Epidemiology, Columbia University Mailman School of Public Health, New York, NY, USA

### Address correspondence and reprint requests to

Céline Buffel du Vaure  
Centre d'Epidémiologie Clinique, Hôpital Hôtel Dieu, 1 place du Parvis de Notre Dame, 75181 Paris Cedex, France  
E-mail: celine.buffel@aphp.fr  
Tel: +33 (0)1 42 34 78 31 Fax: +33 (0)1 42 34 87 90

**Keywords:** multimorbidity, chronic disease, primary care, practice guidelines

# Appendices

## Appendix 1. Description of the moderate severity of each condition

|                       |                                                                                                                                                                                                                                                                                                                                                                                                 |
|-----------------------|-------------------------------------------------------------------------------------------------------------------------------------------------------------------------------------------------------------------------------------------------------------------------------------------------------------------------------------------------------------------------------------------------|
| <b>Hypertension</b>   | Stage II (systolic BP $\geq$ 160 mmHg or diastolic BP $\geq$ 100 mmHg)<br>Uncomplicated: without damage to target organ (heart, brain, chronic kidney disease, peripheral arterial disease, retinopathy)                                                                                                                                                                                        |
| <b>Depression</b>     | Mild (few, if any, symptoms in excess of those required for the diagnosis and only minor impairment in occupational and/or social functioning) to moderate (symptoms or functional impairment between mild and severe) for 3 months, not associated with anxiety                                                                                                                                |
| <b>Osteoarthritis</b> | Symptomatic osteoarthritis of one knees:<br>- without current or past upper gastrointestinal problems, or chronic kidney disease<br>- with adequate response to acetaminophen or oral NSAIDs with topical NSAIDs<br>- overweight                                                                                                                                                                |
| <b>CHD</b>            | Stable ischemic heart disease:<br>- benefits from revascularisation longer than 1 year ago<br>- without angina or symptom complex that remained stable for at least 60 days<br>- without change in frequency, duration, precipitating causes or ease of relief of angina for at least 60 days<br>- without evidence of recent myocardial damage<br>- without chronic heart failure<br>- smoking |
| <b>Diabetes</b>       | Stabilized diabetes with antidiabetic medication regimen and oral treatment (non-insulin dependent).<br>Uncomplicated diabetes: without damage to target organ (heart, brain, chronic kidney disease, peripheral arterial disease, retinopathy)                                                                                                                                                 |
| <b>COPD</b>           | Group C: high risk, few symptoms, defined by GOLD stage 3 <sup>¥</sup> or 4 (severe or very severe airflow limitation) and/or $\geq$ 2 exacerbations per year <i>and</i> mMRC <sup>†</sup> grade 0-1 or CAT score $<$ 10. Patient smoking.                                                                                                                                                      |

BP, blood pressure; CHD, coronary heart disease; COPD, chronic obstructive pulmonary disease; CAT, COPD assessment test

¥: **GOLD 3 - Severe** (classification of severity or airflow limitation, based on post-bronchodilator force expiratory volume in 1 sec [FEV1]): in patient with predicted ratio of FEV1 to forced volume capacity  $<$ 0.70: FEV1 30–50%

†: **mMRC grade 1** (Modified Medical Research Council for Assessing the severity of breathless): “I get short of breath when hurrying on level ground or walking up a slight hill”

**Appendix 2.** Selected US guidelines for conditions in adults

| <i>Guideline focus</i>   | <i>Title</i>                                                                                                              | <i>Organization</i>                                                                                                                                                                                                      | <i>Year</i> |
|--------------------------|---------------------------------------------------------------------------------------------------------------------------|--------------------------------------------------------------------------------------------------------------------------------------------------------------------------------------------------------------------------|-------------|
| <b>Hypertension</b>      | Hypertension diagnosis and treatment                                                                                      | Institute for Clinical Systems Improvement                                                                                                                                                                               | 2012        |
| <b>Diabetes</b>          | Diagnosis and management of type 2 diabetes mellitus in adults                                                            | Institute for Clinical Systems Improvement                                                                                                                                                                               | 2012        |
| <b>CHD</b>               | Management of stable ischemic heart disease: summary of a clinical-practice guideline                                     | American College of Physicians/American College of Cardiology Foundation/American Heart Association/American Association for Thoracic Surgery/Preventive Cardiovascular Nurses Association/Society of Thoracic Surgeons. | 2012        |
| <b>COPD</b>              | Global strategy for the diagnosis, management, and prevention of chronic obstructive pulmonary disease                    | Global Initiative for Chronic Obstructive Lung Disease                                                                                                                                                                   | 2013        |
| <b>Depression</b>        | Major depression in adults in primary care                                                                                | Institute for Clinical Systems Improvement                                                                                                                                                                               | 2012        |
| <b>Osteoarthritis</b>    | Recommendations for the use of nonpharmacologic and pharmacologic therapies for osteoarthritis of the hand, hip, and knee | American College of Rheumatology                                                                                                                                                                                         | 2012        |
| <b>Smoking cessation</b> | Tobacco treatment                                                                                                         | University of Michigan Health System                                                                                                                                                                                     | 2012        |
| <b>Overweight</b>        | Management of overweight and obesity in adults                                                                            | Michigan Quality Improvement Consortium                                                                                                                                                                                  | 2011        |
| <b>Prevention</b>        | Summary of recommendations for clinical prevention                                                                        | American Academy of Family Physicians                                                                                                                                                                                    | 2013        |
| <b>Vaccination</b>       | Immunizations                                                                                                             | Institute for Clinical Systems Improvement                                                                                                                                                                               | 2012        |

COPD, chronic obstructive pulmonary disease

**Appendix 3.** Synthesis of evidence for guidelines and recommendations for comorbid condition

|                            | <i>Strong recommendations</i> | <i>Moderate recommendations</i> | <i>Specific recommendations for patients with one comorbid condition</i>                                                                                                                                                                                                                                                                              |
|----------------------------|-------------------------------|---------------------------------|-------------------------------------------------------------------------------------------------------------------------------------------------------------------------------------------------------------------------------------------------------------------------------------------------------------------------------------------------------|
| <b>Hypertension</b>        | 7                             | 1                               | <ul style="list-style-type: none"> <li>- Chronic kidney disease</li> <li>- Coronary artery disease or left ventricular hypertrophy</li> <li>- Chronic heart failure</li> <li>- Older age (&gt; 60 years)</li> <li>- Diabetes mellitus</li> <li>- Depression</li> <li>- Cardiovascular disease</li> </ul>                                              |
| <b>Diabetes</b>            | 11                            | 1                               | <ul style="list-style-type: none"> <li>- Congestive heart failure</li> <li>- COPD</li> <li>- Obstructive sleep apnea</li> <li>- Hepatic disease</li> <li>- Renal dysfunction</li> <li>- Peripheral vascular disease</li> <li>- Depression, hypertension</li> <li>- Pain</li> <li>- Cardiovascular disease</li> </ul>                                  |
| <b>CHD</b>                 | 13                            | 0                               | <ul style="list-style-type: none"> <li>- Hypertension</li> <li>- Women</li> <li>- Older age (&gt;75 years)</li> <li>- Diabetes mellitus</li> <li>- Chronic kidney disease</li> <li>- Obesity</li> <li>- HIV infection</li> <li>- Rheumatoid arthritis</li> <li>- Systemic lupus erythematosus</li> <li>- Socioeconomic factors</li> </ul>             |
| <b>COPD</b>                | 5                             | 2                               | <ul style="list-style-type: none"> <li>- Ischemic heart disease</li> <li>- Heart failure</li> <li>- Atrial fibrillation</li> <li>- Hypertension</li> <li>- Osteoporosis</li> <li>- Anxiety and Depression</li> <li>- Lung cancer</li> <li>- Infections</li> <li>- Diabetes</li> <li>- Metabolic syndrome</li> <li>- Cardiovascular disease</li> </ul> |
| <b>Depression</b>          | 3                             | 1                               | <ul style="list-style-type: none"> <li>- Psychiatric comorbidity</li> <li>- Cerebrovascular disease</li> <li>- Diabetes</li> <li>- Chronic pain</li> <li>- Cardiovascular disease</li> </ul>                                                                                                                                                          |
| <b>Osteoarthritis</b>      | 6                             | 0                               | <ul style="list-style-type: none"> <li>- Upper gastrointestinal problems</li> <li>- Chronic kidney disease</li> <li>- Cardiovascular disease</li> </ul>                                                                                                                                                                                               |
| <b>Prevention services</b> | 2                             | 0                               |                                                                                                                                                                                                                                                                                                                                                       |
| <b>Tobacco use</b>         | 2                             | 0                               |                                                                                                                                                                                                                                                                                                                                                       |
| <b>Overweight</b>          | 2                             | 0                               |                                                                                                                                                                                                                                                                                                                                                       |

**Appendix 4.** Guideline contents, extraction of recommendations, and how health-related activities are considered (part1/5).

|                     | <b>Content of guidelines</b>                                                                                                                                                                                                                                                                                                                                                                                                                                                                                                                                                                                                                                                                           | <b>Considered as</b>                                                          |
|---------------------|--------------------------------------------------------------------------------------------------------------------------------------------------------------------------------------------------------------------------------------------------------------------------------------------------------------------------------------------------------------------------------------------------------------------------------------------------------------------------------------------------------------------------------------------------------------------------------------------------------------------------------------------------------------------------------------------------------|-------------------------------------------------------------------------------|
| <b>Hypertension</b> | A thiazide-type diuretic should be considered as initial therapy in most patients with uncomplicated hypertension                                                                                                                                                                                                                                                                                                                                                                                                                                                                                                                                                                                      | <b>Thiazide-type diuretic</b> 1 pill/day                                      |
|                     | It is strongly recommended that hypertensive patients be initially treated with and periodically reassessed for adherence to healthy lifestyle habits for both prevention and treatment of hypertension.<br>Lifestyle modification is best initiated and sustained through an educational partnership between the patient and a multidisciplinary health care team.<br>Lifestyle modifications should be reviewed and reemphasized at least annually.                                                                                                                                                                                                                                                  | <b>Multidisciplinary team (educator, dietitian)</b> 1 visit/year <sup>1</sup> |
|                     | Six lifestyle behaviors – not smoking, limiting the use of alcohol, obtaining adequate physical activity, limiting sodium intake, having a diet that emphasizes fruits and vegetables and maintaining a normal weight.                                                                                                                                                                                                                                                                                                                                                                                                                                                                                 | <b>Diet</b> (DASH diet + limiting sodium intake + limiting use of alcohol)    |
|                     | Physical activity: moderate-intensity aerobic (endurance) a minimum of 30 min on 5 days each week or vigorous intensity aerobic physical activity for a minimum of 20 min on 3 days each week.                                                                                                                                                                                                                                                                                                                                                                                                                                                                                                         | <b>Physical activity:</b> 3 times per week – 20 min                           |
|                     | On follow-up visits, history and physical examination should be directed toward detection of hypertensive target organ damage. Once blood pressure is at goal and stable, the patient should be seen at a minimum once a year by the clinician to assess patient adherence, patient satisfaction and any changes in target organ status.                                                                                                                                                                                                                                                                                                                                                               | <b>Physician appointment</b> 1 per year                                       |
|                     | <i>In patients with office blood pressure at goal who demonstrate progressive target organ disease, home monitoring may be beneficial.</i><br>Patient comorbidities such as heart failure, associated diseases such as diabetes: should monitor blood pressure more frequently by home monitoring or by other allied health professionals.<br>Patient comorbidities such as heart failure, associated diseases such as diabetes, and need for laboratory tests influence the frequency of visits. Lifestyle modifications should be reviewed, reemphasized and documented annually. Patients should monitor blood pressure more frequently by home monitoring or by other allied health professionals. | <i>Home blood pressure monitoring 1 per day if diabetes<sup>2</sup></i>       |
|                     | Order tests as necessary, especially if not done within past year.                                                                                                                                                                                                                                                                                                                                                                                                                                                                                                                                                                                                                                     | <b>12-lead ECG</b> 1 per year<br><b>Blood test</b> 1 per year                 |

**Appendix 4.** Guideline contents, extraction of recommendations, and how health-related activities are considered (part 2/5).

|                                                                                                                                                                                      | <b>Content of guidelines</b>                                                                                                                                                                                                                                                                                                                                                                                                                                     | <b>Considered as</b>                                                             |
|--------------------------------------------------------------------------------------------------------------------------------------------------------------------------------------|------------------------------------------------------------------------------------------------------------------------------------------------------------------------------------------------------------------------------------------------------------------------------------------------------------------------------------------------------------------------------------------------------------------------------------------------------------------|----------------------------------------------------------------------------------|
| <b>Diabetes</b>                                                                                                                                                                      | A qualified health professional (which may include a clinician, dietitian, nursing staff and pharmacist) should provide nutrition therapy to a patient diagnosed with type 2 diabetes mellitus (T2DM) as part of a global treatment plan.                                                                                                                                                                                                                        | <b>Counseling</b> with qualified professional: 1 visit/year                      |
|                                                                                                                                                                                      | A qualified healthcare professional (which may include a clinician, nursing staff, pharmacist, and registered dietitian) should counsel a patient diagnosed with T2DM to modify the diet to reduce sodium intake to < 2,300 mg/day.                                                                                                                                                                                                                              | <b>Diet</b>                                                                      |
|                                                                                                                                                                                      | A qualified healthcare professional (which may include a clinician, dietitian, nursing staff and pharmacist) should counsel an overweight patient diagnosed with T2DM about the need to reduce energy intake while maintaining a healthful eating pattern to promote weight loss.                                                                                                                                                                                |                                                                                  |
|                                                                                                                                                                                      | A clinician should advise patients diagnosed with T2DM to complete at least 150 min a week of aerobic physical activity and resistance training at least twice/week.                                                                                                                                                                                                                                                                                             | <b>Physical activity</b> at least 150 min 2 per week.                            |
|                                                                                                                                                                                      | Diabetes self-management or education by a qualified healthcare professional (which may include a clinician, dietitian, nursing staff and pharmacist) should be offered to patients diagnosed with T2DM.                                                                                                                                                                                                                                                         | <b>Self management:</b> 1 visit/year <sup>3</sup>                                |
|                                                                                                                                                                                      | Foot care education. A clinician should advise patients diagnosed with T2DM to complete at least 150 min a week of aerobic physical activity and resistance training at least twice/week.                                                                                                                                                                                                                                                                        |                                                                                  |
|                                                                                                                                                                                      | A clinician should initiate metformin as first-line pharmacotherapy for patients with T2DM, unless medically contraindicated.                                                                                                                                                                                                                                                                                                                                    | <b>Metformin</b> 3 pills/day                                                     |
|                                                                                                                                                                                      | A clinician should recommend high-intensity statin therapy for patients diagnosed with T2DM, age 40 to 75 years, with established arteriosclerotic cardiovascular disease. A clinician should recommend moderate- or high-intensity statin therapy for all patients diagnosed with T2DM age 40 to 75 years with low-density lipoprotein level $\geq 70$ mg/dL.                                                                                                   | <b>Statin</b> 1 pill/day                                                         |
|                                                                                                                                                                                      | When hypertension is identified, it should be aggressively treated to achieve a target blood pressure of < 140/90 mm Hg. In many patients with diabetes, 2 or 3 or more antihypertensive agents may be needed to achieve this goal. The use of generic combination tablets (such as angiotensin-converting enzyme [ACE] inhibitor plus calcium-channel blocker, or beta-blocker plus diuretic) can reduce the complexity of the regimen and out-of-pocket costs. | <b>ACE inhibitors plus calcium-channel antagonist</b> 1 pill/day if hypertension |
|                                                                                                                                                                                      | Regular follow-up with the health care team (via office visit, e-visit, telephone, labs, etc.) should be scheduled yearly.                                                                                                                                                                                                                                                                                                                                       | <b>Health care team or physician</b> 1 visit/year                                |
|                                                                                                                                                                                      | A dilated eye examination for diabetic eye disease performed by an ophthalmologist or optometrist is recommended annually for patients with T2DM. Less frequent exams (every 2 to 3 years) may be considered in the setting of a normal eye exam.                                                                                                                                                                                                                | <b>Ophthalmologist</b> 1 visit/year                                              |
|                                                                                                                                                                                      | Urinary albumin excretion should be tested annually by a microalbuminuria method.                                                                                                                                                                                                                                                                                                                                                                                | <b>Blood/urine test</b> 1 visit/year                                             |
|                                                                                                                                                                                      | Measure serum creatinine at least annually and more often based on stage of chronic kidney disease.                                                                                                                                                                                                                                                                                                                                                              |                                                                                  |
| Influenza vaccine every year                                                                                                                                                         | <b>Influenza vaccine</b> every year                                                                                                                                                                                                                                                                                                                                                                                                                              |                                                                                  |
| Pneumococcal vaccine every 5 years                                                                                                                                                   | <b>Pneumococcal vaccine</b> every 5 years                                                                                                                                                                                                                                                                                                                                                                                                                        |                                                                                  |
| Major clinical trials assessing the impact of glycemic control on diabetes complications have included self-monitoring blood glucose testing as part of multifactorial interventions | <b>Self monitoring blood glucose</b> testing 24/month <sup>4</sup>                                                                                                                                                                                                                                                                                                                                                                                               |                                                                                  |

**Appendix 4.** Guideline contents, extraction of recommendations, and how health-related activities are considered (part 3/5).

|            | <b>Content of guidelines</b>                                                                                                                                                                                                                                                                                                                                                                                                                                                                                                                                                                                                                                                                                                                                                  | <b>Considered as</b>                                                                                  |
|------------|-------------------------------------------------------------------------------------------------------------------------------------------------------------------------------------------------------------------------------------------------------------------------------------------------------------------------------------------------------------------------------------------------------------------------------------------------------------------------------------------------------------------------------------------------------------------------------------------------------------------------------------------------------------------------------------------------------------------------------------------------------------------------------|-------------------------------------------------------------------------------------------------------|
| <b>CHD</b> | The organizations recommend that patients with stable ischemic heart disease should have <b>an individualized education plan</b> to optimize care and promote wellness. Patients with stable ischemic heart disease should be educated regarding the following lifestyle elements that may influence prognosis: weight control and maintenance, lipid management, blood pressure control, smoking cessation, individualized medical, nutrition, and lifestyle education for patient with diabetes. Encouraging weight maintenance/reduction through an appropriate balance of lifestyle physical activity, structured exercise, caloric intake, and formal behavioral programs when indicated to maintain/achieve a body mass index between 18.5 and 24.9 kg/m <sup>2</sup> . | <b>Individualized education plan</b><br>1 visit/year                                                  |
|            |                                                                                                                                                                                                                                                                                                                                                                                                                                                                                                                                                                                                                                                                                                                                                                               | <b>Diet</b>                                                                                           |
|            | Patients with stable ischemic heart disease should be encouraged to engage in 30–60 min of moderate-intensity aerobic activity, such as brisk walking, at least 5 days and preferably 7 days of the week, supplemented by an increase in daily activities.                                                                                                                                                                                                                                                                                                                                                                                                                                                                                                                    | <b>Physical activity</b> daily during<br>30 min                                                       |
|            | A moderate or high dose of a statin therapy should be prescribed.                                                                                                                                                                                                                                                                                                                                                                                                                                                                                                                                                                                                                                                                                                             | <b>Statin</b> 1 pill/day                                                                              |
|            | Aspirin, 75–162 mg daily.                                                                                                                                                                                                                                                                                                                                                                                                                                                                                                                                                                                                                                                                                                                                                     | <b>Aspirin</b> 1 pill/day                                                                             |
|            | Beta-blocker therapy should be initiated and continued for 3 years in all patients with normal left ventricular function following myocardial infarction or acute coronary syndromes.                                                                                                                                                                                                                                                                                                                                                                                                                                                                                                                                                                                         | <b>Beta-blocker</b> 1 pill/day                                                                        |
|            | ACE inhibitors should be prescribed in all patients with stable ischemic heart disease who also have hypertension, diabetes, left ventricular systolic dysfunction (ejection fraction <40%), and/or chronic kidney disease, unless contraindicated.                                                                                                                                                                                                                                                                                                                                                                                                                                                                                                                           | <i>ACE inhibitors 1 pill/day if<br/>hypertension or diabetes</i>                                      |
|            | Sublingual nitroglycerin or nitroglycerin spray should be used for immediate relief of angina in patients with stable ischemic heart disease.                                                                                                                                                                                                                                                                                                                                                                                                                                                                                                                                                                                                                                 | Not considered                                                                                        |
|            | Annual influenza vaccine                                                                                                                                                                                                                                                                                                                                                                                                                                                                                                                                                                                                                                                                                                                                                      | <b>Influenza vaccine</b> 1/year                                                                       |
|            | Smoking cessation                                                                                                                                                                                                                                                                                                                                                                                                                                                                                                                                                                                                                                                                                                                                                             | <b>Smoking cessation</b>                                                                              |
|            | Patients should receive periodic follow-up at least annually that includes all of the following:<br>A. Assessment of symptoms and clinical function.<br>B. Surveillance for complications of stable ischemic heart disease, including heart failure and arrhythmias.<br>C. Monitoring of cardiac risk factors.<br>D. Assessment of the adequacy of and adherence to recommended lifestyle changes and medical therapy                                                                                                                                                                                                                                                                                                                                                         | <b>Physician appointment</b> 1<br>visit/year<br><b>12-lead ECG</b> 1/year<br><b>Blood test</b> 1/year |
|            | The organizations recommend that radionuclide myocardial perfusion imaging, echocardiography, or cardiac MRI, with exercise or pharmacologic stress or coronary/cardiac CT angiography, should not be used for follow-up assessment in patients with stable ischemic heart disease, if performed more frequently than at a) 5-year intervals after coronary artery bypass graft or b) 2-year intervals after percutaneous coronary intervention.                                                                                                                                                                                                                                                                                                                              | 1 exam every 2 years                                                                                  |

**Appendix 4.** Guideline contents, extraction of recommendations, and how health-related activities are considered (part 4/5).

|                   | <b>Content of guidelines</b>                                                                                                                                                                                                                                                                                                                                                                                                                                                                                                                                                                          | <b>Considered as</b>                                                                    |
|-------------------|-------------------------------------------------------------------------------------------------------------------------------------------------------------------------------------------------------------------------------------------------------------------------------------------------------------------------------------------------------------------------------------------------------------------------------------------------------------------------------------------------------------------------------------------------------------------------------------------------------|-----------------------------------------------------------------------------------------|
| <b>COPD</b>       | Group C patients have few symptoms but a high risk of exacerbations. A first choice of fixed combination of inhaled corticosteroids/long-acting beta 2-agonist or a long acting anticholinergic is recommended.                                                                                                                                                                                                                                                                                                                                                                                       | <b>Combination of long-acting beta2-agonist and inhaled corticosteroids</b> twice daily |
|                   | Influenza vaccines can reduce serious illness and death in COPD patients.                                                                                                                                                                                                                                                                                                                                                                                                                                                                                                                             | <b>Influenza vaccine</b> 1/year                                                         |
|                   | Pneumococcal vaccination                                                                                                                                                                                                                                                                                                                                                                                                                                                                                                                                                                              | <b>Pneumococcal vaccine</b> 1 every 5 years                                             |
|                   | Smoking cessation is the key intervention for all COPD patients who continue to smoke. Health care providers are important to the delivery of smoking cessation messages and interventions and should encourage all patients who smoke to quit, even when patients visit a healthcare provider for reasons unrelated to COPD or breathing problems.                                                                                                                                                                                                                                                   | <b>Smoking cessation</b> (details in specific guidelines)                               |
|                   | Routine follow-up is essential in COPD.                                                                                                                                                                                                                                                                                                                                                                                                                                                                                                                                                               | <b>Physician appointment</b> 1 visit/year                                               |
|                   | Physical activity is recommended for all patients with COPD. [...] Given the overall population benefits of physical exercise and its role in primary and secondary prevention of cardiovascular disease, it seems intuitively correct to recommend daily physical activity.                                                                                                                                                                                                                                                                                                                          | <b>Physical activity</b> daily                                                          |
|                   | Decline in lung function is best tracked by spirometry performed at least once a year to identify patients whose lung function is declining quickly.                                                                                                                                                                                                                                                                                                                                                                                                                                                  | <b>Spirometry</b> 1 visit/year                                                          |
| <b>Depression</b> | A collaborative care approach is recommended for patients with depression in primary care (depression care manager, primary physician, consulting psychiatrist, others). Clinicians should establish and maintain follow-up with patients. If the initial presentation is mild to moderate, either an antidepressant or psychotherapy (or both) is indicated. If the presenting symptoms of depression are severe or chronic, the initial recommendation is to treat with antidepressants and psychotherapy. Initially consider weekly contacts to ensure adequate engagement, then at least monthly. | <b>Collaborative care approach:</b> 1 visit to health caregiver/month                   |
|                   | Physical activity at a dose consistent with public health recommendations is a useful tool for easing major depression symptoms. A goal of 30 min of moderate-intensity aerobic exercise, 3 to 5 days a week is recommended for otherwise healthy adults                                                                                                                                                                                                                                                                                                                                              | <b>Physical activity</b> 3 times/week for 30 min                                        |
|                   | Selective serotonin reuptake inhibitors (SSRIs) — as well as venlafaxine, duloxetine, desvenlafaxine, mirtazapine and bupropion — are frequently recommended as first-line antidepressant treatment options owing to the quality and quantity of published data.                                                                                                                                                                                                                                                                                                                                      | <b>SSRIs</b> , 1pill/day                                                                |

1. Appel LJ, Brands MW, Daniels SR, Karanja N, Elmer PJ, Sacks FM. Dietary approaches to prevent and treat hypertension: a scientific statement from the American Heart Association. *Hypertension*. 2006 Feb;47(2):296–308.
2. Cappuccio FP, Kerry SM, Forbes L, Donald A. Blood pressure control by home monitoring: meta-analysis of randomised trials. *BMJ*. 2004 Jul 17;329(7458):145.
3. Duke S, Colagiuri S, Colagiuri R. Individual patient education for people with type 2 diabetes mellitus. *Cochrane Database*. 2009;(1).
4. Malanda UL, Welschen LMC, Riphagen II, Dekker JM, Nijpels G, Bot SDM. Self-monitoring of blood glucose in patients with type 2 diabetes mellitus who are not using insulin. *Cochrane database Syst Rev*. 2012 Jan;1:CD005060.
5. Fpb K, Lra VDB, Buchbinder R, Rh O, Rv J, Pitt V. Self-management education programmes for osteoarthritis ( Review ). 2014;(1).
6. Kingsbury SR, Hensor EM a, Walsh C a E, Hochberg MC, Conaghan PG. How do people with knee osteoarthritis use osteoarthritis pain medications and does this change over time? Data from the Osteoarthritis Initiative. *Arthritis Res Ther. BioMed Central Ltd*; 2013 Jan;15(5):R106.



**Appendix 4.** Guideline contents, extraction of recommendations, and how health-related activities are considered (part 5/5).

|                            | <b>Content of guidelines</b>                                                                                                                                                                                                                                                                                                                                                                                                                                                                                                                                          | <b>Considered as</b>                                                  |
|----------------------------|-----------------------------------------------------------------------------------------------------------------------------------------------------------------------------------------------------------------------------------------------------------------------------------------------------------------------------------------------------------------------------------------------------------------------------------------------------------------------------------------------------------------------------------------------------------------------|-----------------------------------------------------------------------|
| <b>Knee osteoarthritis</b> | Participate in cardiovascular (aerobic) and/or resistance land-based exercise OR Aquatic exercise                                                                                                                                                                                                                                                                                                                                                                                                                                                                     | <b>Physical activity</b> 20 min/day, 5 days/week                      |
|                            | Lose weight                                                                                                                                                                                                                                                                                                                                                                                                                                                                                                                                                           | <b>Diet</b>                                                           |
|                            | Self-management program (psychosocial intervention)                                                                                                                                                                                                                                                                                                                                                                                                                                                                                                                   | <b>Education</b> 1 visit/year <sup>5</sup>                            |
|                            | Receive manual therapy in combination with supervised intervention + taping                                                                                                                                                                                                                                                                                                                                                                                                                                                                                           | Considered during the physical activity                               |
|                            | Be instructed in the use of thermal agent<br>Use walking aids<br>Participate in tai chi program                                                                                                                                                                                                                                                                                                                                                                                                                                                                       | Not considered                                                        |
|                            | Acetaminophen or oral NSAIDs or tramadol                                                                                                                                                                                                                                                                                                                                                                                                                                                                                                                              | 3 pills/day <sup>6</sup><br><b>Physician appointment</b> 1 visit/year |
|                            | Topical NSAIDs                                                                                                                                                                                                                                                                                                                                                                                                                                                                                                                                                        | Twice daily                                                           |
|                            | Intra-articular corticosteroid injections                                                                                                                                                                                                                                                                                                                                                                                                                                                                                                                             | 3 injections/year                                                     |
| <b>Tobacco use</b>         | ASSIST:<br><ol style="list-style-type: none"> <li>1. Help the patient with a quit plan.</li> <li>2. Consider referral to intensive counseling (multi-session, group or individual), frequently defined as a minimum of weekly meetings for the first 4–7 weeks of cessation</li> <li>3. Encourage pharmacologic therapies as appropriate: nicotine replacement therapies, bupropion hydrochloride, and varenicline have been proven effective..</li> <li>4. Give key advice on successful quitting</li> <li>5. Provide supplementary educational materials</li> </ol> | Nicotine substitute: 2/day<br><br>Intensive counseling 4 visits/month |
|                            | ARRANGE: Arrange follow-up at the same visit patient sets quit date.                                                                                                                                                                                                                                                                                                                                                                                                                                                                                                  |                                                                       |
| <b>Overweight</b>          | Help your patient set a goal for reducing calories and adjusting to maintain gradual weight loss.                                                                                                                                                                                                                                                                                                                                                                                                                                                                     | <b>Diet</b>                                                           |
|                            | Help your patient set a goal for physical activity: at minimum, more activity than present; ideally 30 min of moderate physical activity such as brisk walking most days of the week.                                                                                                                                                                                                                                                                                                                                                                                 | <b>Physical activity</b> 30 min/day, 5 days/week                      |

|                            |                                                                                                                                                                                                                               |                                                                             |
|----------------------------|-------------------------------------------------------------------------------------------------------------------------------------------------------------------------------------------------------------------------------|-----------------------------------------------------------------------------|
| <b>Prevention services</b> | Annual vaccination against influenza is recommended for all persons aged 6 months or older.                                                                                                                                   | <b>Influenza vaccine</b> 1/year                                             |
|                            | The American Academy of Family Physicians recommends screening for colorectal cancer using fecal occult blood testing, sigmoidoscopy, or colonoscopy, in adults, beginning at age 50 years and continuing until age 75 years. | <b>Occult blood testing or colonoscopy or sigmoidoscopy</b> 1 every 5 years |

**Appendix 5.** Time spent on health-related activities by multimorbidity profiles (part 1/3) (HT, hypertension; D, diabetes; CHD, coronary heart disease; COPD, chronic obstructive pulmonary disease; OA, oseoarthritis; Dp, depression)

|            | <i>Time/month, min</i>  |      |                                       |      |                         |      |                          |      |             | No. medications/day | No. visits/month |
|------------|-------------------------|------|---------------------------------------|------|-------------------------|------|--------------------------|------|-------------|---------------------|------------------|
|            | Pharmacologic treatment |      | Unsupervised behavioural intervention |      | Supervised intervention |      | Monitoring and follow-up |      | Total       |                     |                  |
|            | Mean (SD)               | %    | Mean (SD)                             | %    | Mean (SD)               | %    | Mean (SD)                | %    | Mean (SD)   |                     |                  |
| Dp         | 1.2 (0.9)               | 10.9 | 7.9 (8.8)                             | 70.1 | 0.0 (0.0)               | 0.0  | 2.1 (1.8)                | 19.0 | 11.3 (8.9)  | 1                   | 1.1              |
| HT         | 4.1 (3.2)               | 12.8 | 18.8 (19.3)                           | 59.3 | 8.5 (7.2)               | 26.7 | 0.4 (0.2)                | 1.2  | 31.8 (20.4) | 4                   | 4.3              |
| COPD       | 1.1 (0.9)               | 3.3  | 32.6 (25.6)                           | 94.6 | 0.2 (0.2)               | 0.5  | 0.5 (0.4)                | 1.6  | 34.5 (25.6) | 1                   | 0.4              |
| D          | 4.0 (3.5)               | 10.5 | 30.9 (26.4)                           | 81.8 | 0.4 (0.3)               | 0.9  | 2.6 (1.2)                | 6.8  | 37.8 (26.9) | 4                   | 0.5              |
| OA         | 5.6 (4.2)               | 12.3 | 39.6 (30.1)                           | 86.9 | 0.2 (0.2)               | 0.4  | 0.2 (0.2)                | 0.5  | 45.6 (30.3) | 5                   | 0.5              |
| CHD        | 5.4 (4.5)               | 9.2  | 44.7 (34.4)                           | 75.6 | 8.3 (7.0)               | 14.1 | 0.7 (0.5)                | 1.1  | 59.2 (35.5) | 5                   | 4.5              |
| Dp + OA    | 5.1 (4.2)               | 14.4 | 19.7 (24.6)                           | 55.5 | 8.2 (7.4)               | 23   | 2.5 (2.2)                | 7.1  | 35.6 (25.7) | 5                   | 5.3              |
| Dp + COPD  | 2.2 (1.8)               | 5.9  | 32.7 (23.8)                           | 86.7 | 0.2 (0.2)               | 0.5  | 2.7 (2.0)                | 7.0  | 37.7 (23.9) | 2                   | 1.4              |
| HT + Dp    | 5.0 (4.5)               | 11.3 | 34.2 (27.5)                           | 77.4 | 0.3 (0.3)               | 0.8  | 4.6 (2.3)                | 10.5 | 44.2 (28.0) | 5                   | 1.5              |
| OA + CODP  | 6.7 (6.2)               | 15.0 | 32.2 (22.4)                           | 71.8 | 0.5 (0.4)               | 1.2  | 5.4 (2.6)                | 12.0 | 44.8 (23.2) | 6                   | 0.8              |
| Dp + D     | 6.7 (5.1)               | 14.2 | 39.2 (29.0)                           | 83.5 | 0.4 (0.3)               | 0.8  | 0.7 (0.4)                | 1.5  | 47.0 (29.3) | 6                   | 0.9              |
| HT + D     | 6.9 (5.8)               | 14.1 | 39.6 (28.5)                           | 80.8 | 0.2 (0.1)               | 0.4  | 2.3 (1.8)                | 4.7  | 49.0 (29.0) | 6                   | 1.5              |
| HT + OA    | 10.0 (8.2)              | 18.9 | 39.4 (33.5)                           | 74.9 | 0.5 (0.4)               | 1.0  | 2.7 (1.1)                | 5.2  | 52.6 (34.4) | 9                   | 1.0              |
| OA + D     | 5.0 (3.9)               | 8.5  | 45.1 (34.1)                           | 75.8 | 8.4 (7.2)               | 14.2 | 0.9 (0.6)                | 1.5  | 59.5 (35.0) | 5                   | 4.6              |
| HT + COPD  | 6.1 (5.1)               | 10.2 | 44.2 (34.9)                           | 74.2 | 8.5 (7.0)               | 14.2 | 0.8 (0.5)                | 1.4  | 59.6 (35.9) | 6                   | 4.6              |
| Dp + CHD   | 11.0 (8.7)              | 17.4 | 42.9 (28.5)                           | 67.9 | 8.5 (6.7)               | 13.4 | 0.8 (0.5)                | 1.3  | 63.1 (30.6) | 10                  | 4.9              |
| HT + CHD   | 6.3 (5.3)               | 10.0 | 45.9 (34.9)                           | 72.5 | 8.4 (7.2)               | 13.3 | 2.7 (2.0)                | 4.3  | 63.3 (36.0) | 6                   | 5.5              |
| COPD + D   | 8.2 (7.5)               | 13.0 | 43.9 (31.2)                           | 69.3 | 8.3 (7.7)               | 13.1 | 2.9 (1.2)                | 4.6  | 63.4 (33.1) | 8                   | 4.7              |
| OA + CHD   | 7.3 (6.6)               | 11.5 | 46.8 (34.7)                           | 73.5 | 8.6 (7.5)               | 13.4 | 1.0 (0.6)                | 1.6  | 63.7 (36.1) | 7                   | 4.7              |
| CHD + COPD | 10.3 (8.4)              | 15.7 | 45.9 (33.6)                           | 70.4 | 8.5 (6.9)               | 13.0 | 0.6 (0.4)                | 0.9  | 65.2 (35.1) | 9                   | 4.7              |
| CHD + D    | 8.5 (7.4)               | 12.8 | 45.8 (33.5)                           | 69.4 | 8.7 (7.4)               | 13.3 | 3.0 (1.4)                | 4.6  | 66.0 (35.3) | 8                   | 4.8              |

Data are mean (SD) and percentage of total time. OA is associated with overweight. CHD and COPD are associated with smoking

**Appendix 5.** Time spent on health-related activities by multimorbidity profile (part 2/3)

|                      | <i>Time/month, min</i>  |      |                                       |      |                         |      |                          |      | No. medications/day | No. visits/month |           |
|----------------------|-------------------------|------|---------------------------------------|------|-------------------------|------|--------------------------|------|---------------------|------------------|-----------|
|                      | Pharmacologic treatment |      | Unsupervised behavioural intervention |      | Supervised intervention |      | Monitoring and follow-up |      |                     |                  | Total     |
|                      | Mean (SD)               | %    | Mean (SD)                             | %    | Mean (SD)               | %    | Mean (SD)                | %    |                     |                  | Mean (SD) |
| HT + D + Dp          | 7.4 (6.5)               | 14.9 | 34.2 (26.4)                           | 69.0 | 0.5 (0.6)               | 1.1  | 7.5 (3.4)                | 15.1 | 49.6 (27.3)         | 7                | 1.8       |
| HT + OA + Dp         | 7.7 (5.9)               | 15.1 | 40.3 (32.5)                           | 78.9 | 0.3 (0.3)               | 0.7  | 2.8 (2.1)                | 5.4  | 51.1 (32.9)         | 7                | 1.9       |
| D + OA + Dp          | 11.0 (9.0)              | 19.5 | 40.0 (31.6)                           | 70.8 | 0.5 (0.5)               | 0.9  | 5.0 (2.7)                | 8.8  | 56.5 (33.7)         | 10               | 2.0       |
| HT + D + OA          | 11.9 (10.2)             | 21.1 | 38.5 (26.7)                           | 68.0 | 0.7 (0.6)               | 1.2  | 5.5 (2.4)                | 9.6  | 56.6 (29.2)         | 11               | 1.2       |
| HT + CHD + COPD      | 8.5 (7.8)               | 13.6 | 44.9 (32.7)                           | 71.5 | 8.2 (6.7)               | 13.0 | 1.2 (0.7)                | 1.9  | 62.7 (33.7)         | 8                | 4.8       |
| HT + COPD + Dp       | 6.2 (5.1)               | 9.7  | 45.8 (33.7)                           | 72.2 | 8.5 (7.1)               | 13.4 | 2.9 (2.0)                | 4.6  | 63.4 (34.8)         | 6                | 5.6       |
| CHD + COPD + Dp      | 7.9 (6.7)               | 12.4 | 44.3 (31.5)                           | 69.6 | 8.5 (7.4)               | 13.3 | 3.0 (2.3)                | 4.7  | 63.6 (32.9)         | 8                | 5.7       |
| HT + CHD + Dp        | 7.2 (6.2)               | 11.2 | 44.8 (32.5)                           | 70.5 | 8.7 (7.8)               | 13.7 | 2.9 (2.1)                | 4.6  | 63.6 (33.4)         | 7                | 5.6       |
| HT + COPD + OA       | 10.5 (8.8)              | 16.2 | 44.9 (30.9)                           | 68.9 | 8.7 (7.5)               | 13.3 | 1.1 (0.6)                | 1.6  | 65.2 (32.5)         | 10               | 5.0       |
| HT + CHD + OA        | 11.8 (9.4)              | 18.0 | 43.9 (32.9)                           | 67.1 | 8.8 (7.8)               | 13.5 | 1.0 (0.6)                | 1.5  | 65.4 (34.8)         | 11               | 5.1       |
| D + CHD + COPD       | 10.6 (9.8)              | 15.9 | 44.4 (31.0)                           | 66.3 | 8.6 (7.2)               | 12.8 | 3.4 (1.6)                | 5.0  | 67.0 (33.5)         | 10               | 5.0       |
| D + CHD + Dp         | 9.1 (7.8)               | 13.5 | 44.4 (33.1)                           | 66.0 | 8.7 (7.7)               | 13.0 | 5.0 (2.4)                | 7.4  | 67.3 (35.3)         | 9                | 5.8       |
| D + COPD + Dp        | 9.2 (8.3)               | 13.5 | 45.1 (31.5)                           | 66.4 | 8.5 (7.6)               | 12.6 | 5.1 (2.7)                | 7.5  | 67.9 (33.2)         | 9                | 5.7       |
| COPD + OA + Dp       | 11.4 (9.5)              | 16.6 | 45.5 (34.6)                           | 66.7 | 8.7 (7.0)               | 12.7 | 2.7 (2.2)                | 3.9  | 68.2 (36.7)         | 10               | 5.7       |
| CHD + COPD + OA      | 12.8 (10.5)             | 18.7 | 45.5 (31.0)                           | 66.3 | 9.1 (8.2)               | 13.3 | 1.2 (0.7)                | 1.7  | 68.7 (34.0)         | 12               | 5.1       |
| HT+D + COPD          | 10.4 (10.3)             | 14.9 | 45.2 (32.9)                           | 64.7 | 8.5 (6.5)               | 12.1 | 5.8 (2.5)                | 8.3  | 69.8 (34.6)         | 10               | 5.0       |
| HT + D + CHD         | 10.4 (9.4)              | 14.9 | 45.1 (30.8)                           | 64.5 | 8.8 (6.9)               | 12.6 | 5.6 (2.6)                | 8.0  | 69.9 (33.0)         | 10               | 5.0       |
| CHD + OA + Dp        | 12.0 (10.7)             | 17.1 | 46.8 (35.2)                           | 66.9 | 8.3 (6.9)               | 11.8 | 2.9 (2.3)                | 4.1  | 70.0 (37.2)         | 11               | 5.9       |
| D + CHD + OA         | 14.1 (12.6)             | 20.2 | 43.9 (32.6)                           | 62.6 | 8.9 (7.9)               | 12.6 | 3.2 (1.5)                | 4.6  | 70.1 (36.2)         | 13               | 5.2       |
| D + COPD + OA        | 14.1 (14.1)             | 19.8 | 44.6 (31.1)                           | 62.7 | 9.3 (9.0)               | 13.1 | 3.1 (1.3)                | 4.4  | 71.0 (34.5)         | 13               | 5.1       |
| HT + D + OA + Dp     | 12.5 (9.8)              | 20.6 | 39.5 (30.2)                           | 65.4 | 0.7 (0.6)               | 1.2  | 7.7 (3.6)                | 12.8 | 60.4 (32.4)         | 12               | 2.2       |
| HT + CHD + COPD + Dp | 9.2 (9.4)               | 13.9 | 44.8 (30.9)                           | 67.7 | 9.0 (8.2)               | 13.5 | 3.2 (2.2)                | 4.8  | 66.1 (33.9)         | 9                | 5.8       |
| HT + CHD + COPD + OA | 14.0 (11.7)             | 20.8 | 43.4 (32.7)                           | 64.5 | 8.6 (7.6)               | 12.8 | 1.3 (0.8)                | 2.0  | 67.4 (35.1)         | 13               | 5.2       |

Data are mean (SD) and percentage of total time. OA is also associated with overweight. CHD and COPD are associated with smoking

**Appendix 5.** Time spent on health-related activities by multimorbidity profile (part 3/3)

|                           | <i>Time/month, min</i>  |      |                                       |      |                         |      |                          |      | No. medications/day | No. visits/month |           |
|---------------------------|-------------------------|------|---------------------------------------|------|-------------------------|------|--------------------------|------|---------------------|------------------|-----------|
|                           | Pharmacologic treatment |      | Unsupervised behavioural intervention |      | Supervised intervention |      | Monitoring and follow-up |      |                     |                  | Total     |
|                           | Mean (SD)               | %    | Mean (SD)                             | %    | Mean (SD)               | %    | Mean (SD)                | %    |                     |                  | Mean (SD) |
| HT + COPD + OA + Dp       | 11.9 (10.0)             | 17.2 | 44.7 (31.4)                           | 64.9 | 9.1 (7.3)               | 13.2 | 3.2 (2.3)                | 4.6  | 68.8 (34.4)         | 11               | 6.0       |
| HT + CHD + OA + Dp        | 12.3 (10.6)             | 17.7 | 45.3 (30.5)                           | 65.0 | 9.0 (8.1)               | 12.9 | 3.0 (2.3)                | 4.4  | 69.7 (33.2)         | 12               | 6.1       |
| CHD + COPD + OA + Dp      | 14.2 (11.7)             | 20.3 | 44.3 (30.8)                           | 63.2 | 8.3 (7.2)               | 11.9 | 3.2 (2.3)                | 4.6  | 70.1 (33.8)         | 13               | 6.1       |
| D + CHD + COPD + Dp       | 11.3 (11.0)             | 16.1 | 44.8 (32.7)                           | 63.4 | 9.0 (7.8)               | 12.8 | 5.4 (2.6)                | 7.7  | 70.6 (36.1)         | 11               | 6.0       |
| HT + D + CHD + Dp         | 11.3 (9.2)              | 15.8 | 43.5 (30.1)                           | 60.9 | 9.0 (8.2)               | 12.6 | 7.7 (3.5)                | 10.8 | 71.4 (32.7)         | 11               | 6.0       |
| HT + D + CHD + COPD       | 12.6 (11.6)             | 17.6 | 43.8 (31.7)                           | 61.1 | 9.3 (8.8)               | 13.0 | 5.9 (2.6)                | 8.3  | 71.6 (34.1)         | 12               | 5.2       |
| D + COPD + OA + Dp        | 15.4 (13.3)             | 21.1 | 43.4 (31.6)                           | 59.6 | 9.0 (7.8)               | 12.3 | 5.1 (2.9)                | 7.0  | 72.9 (35.3)         | 14               | 6.1       |
| D + CHD + COPD + OA       | 16.9 (15.9)             | 23.1 | 43.9 (31.5)                           | 60.0 | 8.8 (7.1)               | 12.1 | 3.5 (1.5)                | 4.8  | 73.2 (36.2)         | 15               | 5.4       |
| HT + D + COPD + Dp        | 11.4 (10.5)             | 15.5 | 45.2 (32.1)                           | 61.4 | 9.1 (10.9)              | 12.4 | 7.9 (3.5)                | 10.7 | 73.7 (35.8)         | 11               | 6.0       |
| D + CHD + OA + Dp         | 15.1 (13.3)             | 20.4 | 44.5 (33.0)                           | 60.2 | 9.2 (7.7)               | 12.5 | 5.1 (2.6)                | 6.9  | 73.9 (35.7)         | 14               | 6.2       |
| HT + D + CHD + OA         | 16.4 (13.7)             | 22.0 | 43.6 (29.3)                           | 58.5 | 8.8 (7.6)               | 11.8 | 5.7 (2.5)                | 7.6  | 74.6 (33.5)         | 15               | 5.4       |
| HT + D + COPD + OA        | 16.1 (13.8)             | 20.9 | 46.6 (37.0)                           | 60.2 | 8.7 (7.0)               | 11.3 | 6.0 (2.7)                | 7.7  | 77.4 (40.3)         | 15               | 5.4       |
| HT + CHD + COPD + OA + Dp | 14.9 (11.3)             | 20.9 | 44.5 (30.5)                           | 62.6 | 8.4 (6.8)               | 11.8 | 3.3 (2.4)                | 4.7  | 71.1 (33.3)         | 14               | 6.2       |
| HT + D + CHD + COPD + Dp  | 13.7 (11.6)             | 18.1 | 44.5 (32.1)                           | 59.0 | 9.1 (8.2)               | 12.1 | 8.1 (3.4)                | 10.7 | 75.3 (35.8)         | 13               | 6.2       |
| D + CHD + COPD + OA + Dp  | 17.1 (14.3)             | 22.4 | 44.6 (34.5)                           | 58.4 | 9.1 (7.9)               | 11.9 | 5.7 (3.5)                | 7.4  | 76.4 (38.6)         | 16               | 6.4       |
| HT + D + COPD + OA + Dp   | 17.4 (16)               | 22.4 | 43.7 (31.9)                           | 56.2 | 8.8 (8.4)               | 11.3 | 7.9 (3.6)                | 10.1 | 77.8 (37.3)         | 16               | 6.4       |
| HT + D + CHD + COPD + OA  | 18.4 (18.4)             | 23.4 | 44.7 (30.7)                           | 56.8 | 9.5 (9.9)               | 12.0 | 6.2 (2.6)                | 7.8  | 78.7 (37.3)         | 17               | 5.6       |
| HT + D + CHD + OA + Dp    | 16.9 (16.4)             | 21.3 | 45.4 (35.5)                           | 57.2 | 9.1 (8.9)               | 11.5 | 7.9 (3.6)                | 10.0 | 79.4 (40.9)         | 16               | 6.4       |
| 6 conditions              | 19.5 (15.9)             | 24.1 | 44.2 (30.7)                           | 54.8 | 9.0 (7.5)               | 11.1 | 8.1 (3.4)                | 10.0 | 80.7 (35.8)         | 18               | 6.6       |

Data are mean (SD)
